# Supplementary material for: Effects of hazelnut protein isolate-induced food allergy on the gut microenvironment in a BALB/c mouse model
Source: Royal Society of Chemistry journal article supplement (doi:10.1039/d3fo02324a), 2023-01-01
Supplement: d3fo02324a1.xlsx [file d3fo02324a1.xlsx]

## Sheet: Sheet1
Electronic Supplementary Information
Fig.1A
HPI-raw image
Fig.2A
Body Weight (g)	Week	NC
	1	20	20.1	20.9	21.1	20.3	19.9	18.6	20.1
	2	20.2	20.4	22.3	21.6	20.6	19.5	18.6	21.4
	3	20.8	20.9	23.6	22.2	21.3	19.7	20.4	23
	4	21.7	22.1	23.1	24.2	22.1	21.2	21.7	22.6
	5	21.4	23	22.8	24	22.8	20.8	21.9	22.6
	Week	AD
	1	21.9	21.2	20.7	20.7	20.8	19.8	20.8	20
	2	22.4	21.9	21	20.9	20.8	20.4	21.1	20.1
	3	24.7	22.3	22.2	22	23.1	21.1	22.3	23.2
	4	24.5	22	22.8	22.8	23.3	22	22.9	21.3
	5	23.6	22.5	22.5	22.5	22.8	21.3	23.2	21.6
	Week	HS
	1	19.4	19.9	19.5	20.7	20.2	20.6	19.6	18.7
	2	19.5	20.9	20.8	21.2	21.1	21.2	21.4	19.4
	3	21	22.3	21.6	22.9	22.7	21.8	22.2	20.1
	4	21.5	22.7	21.9	23.5	22.1	22.4	23.1	20.8
	5	20.8	21.7	22.8	22.9	23.6	22.6	22.5	21.4
Fig.2B
Anaphylaxis score	NC	AD	HS
	0	0	2
	0	0	2
	0	0	2
	0	0	1
	0	1	2
	0	0	3
	0	0	1
	0	0	1
Fig.2C
Δ Temperature (℃)	NC	AD	HS
	0.65	0.5	-0.7
	0.6	-0.2	-0.3
	0.4	0.3	-0.3
	0.75	0.4	-0.9
	1	-0.05	-0.1
	1.4	0.4	-0.5
	0.3	0.2	0.2
	0.5	0.3	0.4
Fig.2E
HPI-specific IgE (OD450)	NC	AD	HS
	0.084	0.084	0.174
	0.085	0.084	0.106
	0.074	0.094	0.118
	0.071	0.108	0.106
	0.07	0.062	0.217
	0.072	0.081	0.135
Fig.2F
HPI-specific IgG2a (OD450)	NC	AD	HS
	0.169	0.433	1.169
	0.182	0.305	2.539
	0.2	0.251	2.033
	0.188	0.178	1.244
	0.202	0.067	2.273
	0.212	0.286	1.787
Fig.2G
IL-4 (pg/mL)	NC	AD	HS
	118.585	142.2	236.2
	66.985	66.95	196.55
	123.6	142.2	186.15
	80.5	145.65	332.85
	130.55	164.05	273.15
Fig.2H
IL-5 (pg/mL)	NC	AD	HS
	86.364	144.545	153.636
	79.091	88.182	159.091
	80.909	150	162.727
	71.818	100.909	155.455
	93.636	142.727	328.182
Fig.2I
IFN-γ（pg/mL）	NC	AD	HS
	440.208	513.13	667.29
	508.958	508.96	621.46
	463.125	525.63	538.13
	494.375	569.38	848.54
	577.71	567.29	596.46
Fig.2J
IL4/IFN-γ	NC	AD	HS
	0.27	0.28	0.35
	0.13	0.13	0.32
	0.27	0.27	0.35
	0.16	0.26	0.39
	0.23	0.29	0.46
Fig.2K
IL5/IFN-γ	NC	AD	HS
	0.2	0.28	0.23
	0.16	0.17	0.26
	0.17	0.29	0.3
	0.15	0.18	0.18
	0.16	0.25	0.55
Fig.2L
Histamine (ng/mL)	NC	AD	HS
	2.366	2.946	3.171
	2.61	2.661	3.303
	3.222	2.022	6.102
	2.453	1.761	7.887
	2.618	2.439	3.744
	2.223	2.352	5.475
Fig.2M
mMCP-1 (ng/mL)	NC	AD	HS
	154.629	177.486	224.343
	155.771	187.771	202.629
	161.486	187.771	285.486
	185.486	191.2	190.057
	177.486	169.486	218.629
Fig.2N
TNF-α (pg/mL)	NC	AD	HS
	97.714	154.857	497.714
	97.714	220.571	689.143
	114.857	177.714	640.571
	100.571	197.714	937.714
	117.714	297.714	257.714
Fig.2O
MCP-1 (pg/mL)	NC	AD	HS
	32.6	26.6	161.6
	20.6	50.6	312.6
	35.6	68.6	469.6
	50.6	146.6	161.6
	35.6	21.6	86.6
Fig.2P
LPS (pg/mL)	NC	AD	HS
	241.2	298.29	483.82
	226.93	369.65	498.1
	184.11	341.1	726.45
	198.38	326.83	540.91
	255.47	269.74	598
Fig.3D
Secretory IgA (μg/mL)	NC	AD	HS
	33.1	19.65	15.46
	28.47	19.87	15.68
	29.13	19.43	15.46
	27.59	21.64	14.36
	21.64	18.33	14.58
Fig.3E
Occludin (ng/mL)	NC			AD			HS
Duodenum	11.64	8.85	8.74	5.89	5.84	1.35	1.62	1.73	1.73
Jejunum	36.82	27.62	28.11	29.59	28.33	26.03	1.73	2.06	2.11
Ileum	4.63	4.8	5.01	1.68	0.96	2.11	2.66	6.49	6.22
Colon	5.45	4.25	26.2	8.63	11.58	5.73	16.07	10.82	5.45
Fig.3F
Claudin (ng/mL)	NC			AD			HS
Duodenum	10.6	7.63	7.8	6.6	2.59	6.08	3.93	2.29	2.42
Jejunum	79.73	76.42	72.63	66.69	66.3	61.87	45.86	45.6	36.99
Ileum	2.42	5.78	3.89	2.85	2.55	2.77	2.47	5.61	3.54
Colon	5.91	4.88	9.48	6.25	6.9	4.32	6.77	4.36	5.74
Fig.3G
ZO-1 (ng/mL)	NC			AD			HS
Duodenum	5.92	4.14	4.29	3.74	0.44	1.52	0.77	0.15	1.52
Jejunum	10.58	41.05	41.38	16.73	29.65	29.68	41.01	28.98	36.38
Ileum	0.63	3.88	2.18	0.85	0.85	1.18	1.77	4	1.77
Colon	4.93	3.04	3.93	4.81	4.59	3.74	3.41	4.26	4.26
Fig.4A
pH of small intestinal contents	NC	AD	HS
	7.05	7.01	7.18
	6.96	7.1	7.04
	7.2	6.9	6.94
	7.12	6.96	7.03
	7.04	7.01	7.07
Fig.4B
pH of colonic contents	NC	AD	HS
	7.11	7.21	7.3
	7.16	7.19	7.28
	7.07	6.98	7.27
	7.08	7.04	7.33
	7.19	7.01	7.42
Fig.4C
MDA (nmol/mL)	NC			AD			HS
Small intestine	12.2	13.7	13.8	13.5	12.4	11.2	16.3	18.8	16.9
Large intestine	8.6	7.3	9.4	10.3	7.4	11.2	20.1	18.6	17.2
Fig.4D
SOD (U/mL)	NC			AD			HS
	17.15	16.81	17.94	14.16	13.54	13.43	9.71	8.92	9.26
	12.08	11.74	12.3	10.39	10.67	12.25	8.13	8.24	8.47
Fig.4E	NC	AD	HS
Total SCFAs (mg/kg)	2380.1	2622.6	1532
	2533.1	3142.9	1001.2
	2780.3	2215.3	1632.3
Fig.4F
Acetate (mg/kg)	NC	AD	HS
	1840	2070	1260
	2030	2420	755
	2150	1690	1190
Fig.4G
Propionate (mg/kg)	NC	AD	HS
	230	284	138
	259	413	144
	324	308	199
Fig.4H
Butyrate (mg/kg)	NC	AD	HS
	246	197	88.9
	253	223	85.4
	200	188	166
Fig.4I
Isobutyrate (mg/kg)	NC	AD	HS
	16.5	22.9	22.1
	15.2	30.2	2.9
	18.1	11.9	18.8
Fig.4J
Valerate (mg/kg)	NC	AD	HS
	17.6	23.1	1.1
	8.7	21.2	8.3
	11.6	6.1	24.6
Fig.4K
Isovalerate (mg/kg)	NC	AD	HS
	23	20.1	14.2
	13.4	29	3.3
	19.9	6.1	27.7
Fig.4L
Caproate (mg/kg)	NC	AD	HS
	7	5.5	7.7
	6.8	6.5	2.3
	3.7	5.2	6.2
Fig.5A
Shannon	NC	AD	HS
	8.973	8.386	6.166
	8.322	8.749	6.569
	9.262	8.802	6.719
	7.596	8.015	5.476
Fig.5B
Simpson	NC	AD	HS
	0.994	0.991	0.959
	0.991	0.993	0.974
	0.994	0.994	0.976
	0.973	0.99	0.924
Fig.5C
Chao1	NC	AD	HS
	1485.32	1092.5	456.526
	1138.83	1380	475
	1788.85	1472.19	490.071
	987.867	992.667	435.158
Fig.5D	NC	AD	HS
Observed otus	1484	1092	456
	1138	1380	475
	1788	1470	490
	986	991	435
Fig.5G
Relative abundance
	Firmicutes	Bacteroidota	Proteobacteria	Verrucomicrobiota	Acidobacteriota	Desulfobacterota	Campilobacterota	Actinobacteriota	Gemmatimonadota	Chloroflexi	Others
NC	0.360169	0.218233	0.139411	0.01574	0.086098	0.014121	0.024418	0.047055	0.026046	0.017105	0.051606
AD	0.447918	0.292864	0.078272	0.008145	0.041213	0.053021	0.012637	0.023002	0.005014	0.007465	0.030449
HS	0.457039	0.403569	0.029862	0.037068	0.000796	0.015195	0.049233	0.003224	1.9e-05	5.6e-05	0.003941
Fig.6A
Relative abundance
	Bacteroides	Muribaculaceae	Lachnospiraceae_NK4A136_group	Lactobacillus	Parabacteroides	Akkermansia	Alloprevotella	Clostridia_UCG-014	Alistipes	Helicobacter	Others
NC	0.00951	0.115608	0.084118	0.019635	0.004436	0.000685	0.002428	0.031212	0.028039	0.024422	0.679906
AD	0.023543	0.156562	0.073012	0.020925	0.016083	0.002567	0.016198	0.031296	0.038914	0.011462	0.609438
HS	0.105192	0.142662	0.048747	0.099322	0.072434	0.036985	0.030125	0.0247	0.027221	0.049228	0.363383
Fig.6D
Correlation coefficient	sIgE	sIgG2a	Histamine	mMCP-1	IL-4	IL-5	IFN-γ	IL-4/IFN-γ	IL-5/IFN-γ	TNF-α	LPS
Bacteroides	0.707	0.786	0.762	0.69	0.762	0.619	0.976	0.699	0.405	0.85	0.714
Lactobacillus	0.85	0.714	0.69	0.738	0.81	0.595	0.952	0.735	0.476	0.755	0.619
Alloprevotella	0.731	0.714	0.643	0.738	0.69	0.595	0.667	0.819	0.762	0.743	0.976
Erysipelatoclostridium	0.802	0.619	0.381	0.69	0.786	0.69	0.762	0.747	0.69	0.647	0.738
Parabacteroides	0.695	0.833	0.595	0.81	0.714	0.595	0.881	0.615	0.5	0.79	0.619
Helicobacter	0.695	0.857	0.643	0.786	0.643	0.667	0.619	0.542	0.667	0.695	0.452
Sphingomonas	-0.893	-0.685	-0.571	-0.71	-0.761	-0.862	-0.786	-0.809	-0.799	-0.702	-0.939
Correlation coefficient	Secretory IgA	Duodenum occludin	Jejunum occludin	Ileum occludin	Colon occludin	Duodenum claudin	Jejunum claudin	Ileum claudin	Colon claudin	Duodenum ZO-1	Jejunum ZO-1
Bacteroides	-0.898	-0.841	-0.943	0.371	0.174	-0.943	-0.771	0.314	-0.486	-1	-0.086
Lactobacillus	-0.85	-0.928	-1	0.086	0.232	-0.829	-0.714	0.143	-0.257	-0.943	0.029
Alloprevotella	-0.778	-0.58	-0.6	0.371	-0.174	-0.771	-0.771	-0.2	-0.486	-0.657	-0.6
Erysipelatoclostridium	-0.707	-0.754	-0.829	-0.086	0.116	-0.657	-0.543	-0.314	-0.257	-0.771	-0.486
Parabacteroides	-0.814	-0.841	-0.943	0.371	0.174	-0.943	-0.771	0.314	-0.486	-1	-0.086
Helicobacter	-0.539	-0.899	-0.886	0.429	0.464	-0.886	-0.829	0.2	-0.257	-0.943	-0.029
Sphingomonas	0.766	0.708	0.759	-0.152	0.031	0.759	0.698	0.273	0.395	0.759	0.577
Correlation coefficient	Ileum ZO-1	Colon ZO-1	pH-small intestine	pH-large intestine	Total SCFAs	Acetate	Propionate	Butyrate	Isobutyrate	Valerate	Isovalerate
Bacteroides	0.522	-0.203	-0.381	0.905	-0.829	-0.771	-0.771	-0.829	-0.029	-0.6	-0.543
Lactobacillus	0.319	-0.348	-0.167	0.881	-0.771	-0.657	-0.829	-0.771	0.257	-0.657	-0.429
Alloprevotella	-0.087	0.406	-0.571	0.762	-0.829	-0.943	-0.771	-0.657	0.143	0.086	0.143
Erysipelatoclostridium	-0.087	0.116	-0.119	0.857	-0.943	-0.829	-1	-0.771	0.257	-0.486	-0.2
Parabacteroides	0.522	-0.203	-0.167	0.786	-0.829	-0.771	-0.771	-0.829	-0.029	-0.6	-0.543
Helicobacter	0.464	-0.087	0.0001	0.5	-0.771	-0.714	-0.714	-0.943	0.086	-0.543	-0.429
Sphingomonas	0.092	-0.277	0.469	-0.913	0.941	0.941	0.941	0.759	-0.213	0.213	0.03
Correlation coefficient	Caproate	MDA-small intestine	MDA-large intestine	SOD-small intestine	SOD-large intestine
Bacteroides	-0.257	0.886	0.771	-0.886	-0.886
Lactobacillus	0.029	0.771	0.829	-0.771	-0.943
Alloprevotella	-0.086	0.714	0.6	-0.886	-0.714
Erysipelatoclostridium	0.257	0.6	0.829	-0.771	-0.943
Parabacteroides	-0.257	0.886	0.771	-0.886	-0.886
Helicobacter	-0.371	0.943	0.886	-0.771	-0.771
Sphingomonas	-0.091	-0.698	-0.759	0.88	0.88
